# Supplementary material for: Assessment of combined serum sST2 and AFP levels in the diagnosis of hepatocellular carcinoma
Source: PeerJ. 2024 Oct 8;12:e18142. doi: 10.7717/peerj.18142 (PMC11639131; doi:10.7717/peerj.18142)
Supplement: Supplemental Information 1 [file peerj-12-18142-s001.xlsx]

## Sheet: Sheet1
Group	Gender	Age (year)	AFP（ug/L）	sST2（ng/ml）	ALT(U/L)	AST(U/L)	TNM stage	liver cirrhosis	HBV infection	tumor size (cm)	portal vein tumor thrombus	lymph node metastasis	WBC (*10^9/L)	Hb(g/L)	PLT(*10^9/L)	ALB(g/L)	TBIL(μmol/L)	GGT(U/L)	HBV-DNA(IU/mL)	PT (s)	INR	APTT(s)	TT(s)	FIB(g/L)
HCC	male	45	2	14.7	19	38	I	No	No	10.6	No	No	6.02	105	261	33.2	18.4	170	20	13	1.14	31.8	17.7	3.67
HCC	male	66	2.97	15.4	302	53	I	No	No	7.2	No	No	5.34	141	165	43.3	19.1	39	100	12.3	1.07	27.7	19.6	2.76
HCC	male	68	2	16	13	23	I	No	No	3.7	No	No	5.95	159	152	37.8	16.6	31	20	10.9	0.94	26.9	19.4	2.83
HCC	male	54	4.12	22	22	29	I	No	No	4.1	No	No	3.7	152	292	40.2	10.4	84	79600	10.6	0.92	26.6	18.3	2.72
HCC	male	57	1271.94	24.6	15	17	I	No	No	2.9	No	No	6.85	159	295	44.8	12.7	32	20	11.6	1.01	30.5	18.5	2.46
HCC	male	58	2.04	172.8	18	20	I	No	No	9.2	No	No	10.42	155	354	40.2	11	27	100	11.5	1	29.2	17.1	5.12
HCC	female	66	133.48	130.3	6	22	I	No	No	2.3	No	No	4.83	104	243	34	9.4	34	20	10	0.8	27.3	18.9	2.49
HCC	male	61	6.54	14.6	75	77	I	Yes	No	2.1	No	No	4.2	137	125	41.6	26.5	59	20	12.7	1.11	26.2	18.6	3
HCC	male	62	2.53	17.3	22	23	I	Yes	No	2.5	No	No	2.9	156	85	44.9	19.2	28	100	12.6	1.1	25.2	20.1	1.92
HCC	male	29	2	24.5	29	28	I	Yes	No	4.3	No	No	1.85	117	22	38.1	18.1	45	100	13.8	1.21	31.1	19.7	1.31
HCC	male	64	5.38	33.9	12	25	I	Yes	No	2.2	No	No	3.44	70	128	37.4	9.8	40	100	12.3	1	26.8	19	2.11
HCC	male	56	610.77	6.5	10	26	I	No	Yes	2.3	No	No	4.18	139	125	39.7	21.1	30	125	12	0.97	28.9	19.6	2.36
HCC	male	77	15598.6	8.2	27	34	I	No	Yes	8.5	No	No	7.89	148	295	42.2	12.7	40	12900	11.7	1.02	28.8	18	3.39
HCC	male	76	2.46	8.9	47	42	I	No	Yes	2.3	No	No	3.77	98	232	32.2	19.6	26	100	13	1.14	26.4	17.5	3.15
HCC	male	42	129.94	9.9	24	27	I	No	Yes	1.6	No	No	6.98	157	182	48	9.8	99	72.1	11.7	0.95	26.2	19.5	3.07
HCC	male	57	6.85	12.3	14	19	I	No	Yes	2.8	No	No	7.52	139	244	40.3	10.9	25	20	12.6	1.03	27.1	19.9	2.71
HCC	male	50	2	12.4	21	36	I	No	Yes	7.4	No	No	5.75	124	205	35.3	11.4	211	20	12.3	1.07	25.7	18.5	4.02
HCC	male	52	17.33	12.7	28	25	I	No	Yes	1.8	No	No	5.54	146	223	39.5	10.3	44	20	11.5	1	30.2	19.6	2.14
HCC	male	72	330.46	15.2	17	63	I	No	Yes	6.7	No	No	8.87	129	305	43.4	13.6	276	217	12	1.05	25.8	17.5	4.05
HCC	male	76	10.26	15.7	29	45	I	No	Yes	3.4	No	No	5.01	115	124	31.6	10.3	194	20	12.5	1.09	28.2	20.4	1.89
HCC	male	64	411093	17.1	23	74	I	No	Yes	14.1	No	No	4.46	136	194	36.6	20.3	223	2610000	12.4	1.08	27.1	19	3.83
HCC	male	54	94.55	17.9	31	45	I	No	Yes	10	No	No	3.49	144	168	42.8	17.3	19	1010	12.2	1.06	28.7	18.7	2.53
HCC	male	66	2.45	18	98	92	I	No	Yes	3	No	No	5.3	147	169	34.4	15.4	16	100	11.9	1.004	25.1	19	2.68
HCC	male	46	280.88	18.2	24	20	I	No	Yes	2.5	No	No	6.16	122	240	37.3	17.9	18	1750	12.4	1.08	31.4	19.6	1.94
HCC	male	68	2	18.7	29	29	I	No	Yes	3.7	No	No	6.41	151	197	40.3	13.8	37	3460000	10.4	0.9	25	20.2	2.06
HCC	male	22	2	19.6	14	19	I	No	Yes	2.6	No	No	8.18	116	175	33	10.5	40	21900	12	1.05	30.9	19	2.17
HCC	male	71	560.34	21.4	47	35	I	No	Yes	2	No	No	4.05	132	107	32.9	15.9	133	158	12.7	1.03	28.1	19.9	2.27
HCC	male	50	5.2	24	32	30	I	No	Yes	3.4	No	No	7.46	162	220	38.5	15.5	62	166	15.8	1.24	32	15.7	2.02
HCC	male	74	4.43	25.6	23	34	I	No	Yes	10	No	No	6.05	127	301	33	14.4	42	127	13.2	1.08	33.3	19.3	4.67
HCC	male	34	932.68	25.9	21	23	I	No	Yes	3.6	No	No	5.07	144	197	40	12.4	25	100	11.1	0.96	27.8	18.7	2.81
HCC	male	66	71.72	27.8	16	24	I	No	Yes	7	No	No	6.53	154	227	41.5	11.3	66	155	11.7	1.02	29	17.7	2.85
HCC	male	58	2.63	33.5	38	37	I	No	Yes	5.5	No	No	6.12	130	144	36.7	27.2	49	3680000	12.3	1.07	26.2	20.6	2.17
HCC	male	76	34091.1	47.7	34	41	I	No	Yes	14.7	No	No	7.63	116	469	32.3	6.3	176	4400	13.1	1.15	25.3	18.5	4.34
HCC	male	75	4.65	92.4	85	60	II	No	Yes	3	No	No	5.62	172	170	41.8	17.3	60	100	12.1	1.05	26.3	18.8	2.59
HCC	male	70	39.24	95	103	47	I	No	Yes	9	No	No	8.08	142	235	35.4	19.6	216	34800	12.6	1.1	26.6	18.8	2.92
HCC	male	50	86.21	154	8	28	I	No	Yes	12.9	No	No	4.59	104	321	33	17.3	137	214000	14.8	1.3	27.8	17.4	4.76
HCC	female	56	87.35	24.5	26	25	I	No	Yes	2.4	No	No	5.26	151	206	37.9	17.1	19	100	12.1	1.05	28.1	19.7	1.92
HCC	male	74	7.7	5.2	69	73	I	Yes	Yes	3.2	No	No	2.1	116	159	36.2	11.5	69	3160000	13.2	1.15	26.6	20	2
HCC	male	51	203.74	13	22	39	II	Yes	Yes	3.2	No	No	2.68	108	96	28.4	26.9	59	4270	15.3	1.26	30.6	21.8	1.56
HCC	male	69	784.87	14	34	29	I	Yes	Yes	3.5	No	No	8.18	151	145	44.2	18.1	59	1830	11.8	0.96	26.9	19.7	2.38
HCC	male	49	208.96	27.2	31	38	I	Yes	Yes	3.1	No	No	6.64	154	127	40.8	17.9	32	109000	12.8	1.12	25.6	19	2.36
HCC	male	72	43344.7	30.2	45	50	I	Yes	Yes	10	No	No	5.99	105	186	29.7	15.5	305	20	12.5	1.02	29.6	18.7	4.92
HCC	male	78	839.04	37.2	28	29	I	Yes	Yes	2.3	No	No	3.98	164	89	46.3	36.8	77	100	12.1	1.05	28.2	18.4	2.88
HCC	male	55	2.62	49.9	19	31	I	Yes	Yes	2.3	No	No	4.12	143	68	37.9	22.9	76	20	13.8	1.21	29.3	19.3	1.67
HCC	male	55	104.99	54.4	24	20	I	Yes	Yes	3.4	No	No	2.78	140	74	43.5	19	38	20	12.3	1.07	27.1	18.8	1.94
HCC	male	65	1324.73	62.8	34	34	I	Yes	Yes	3.2	No	No	11.64	117	136	39.8	18.6	36	60800	13.9	1.21	23.8	19.3	1.63
HCC	male	54	684.43	68	40	32	I	Yes	Yes	2.7	No	No	3.25	151	70	39.2	21.2	123	100	12.7	1.11	28.6	19.7	1.91
HCC	male	61	44.26	73.8	28	44	I	Yes	Yes	2.7	No	No	4.23	82	101	39.7	18.3	46	1250000	13	1.06	32.1	19.8	1.75
HCC	male	36	10.8	80.7	30	40	I	Yes	Yes	1.6	No	No	3.98	141	120	37	24.3	21	100	13.1	1.15	27.1	19.8	1.58
HCC	male	60	145.31	200	35	28	I	Yes	Yes	3.2	No	No	6.72	148	164	40.2	25.4	31	34400000	12.4	1.08	27.1	18.2	2.71
HCC	female	65	424.36	10.3	16	17	I	Yes	Yes	3.2	No	No	8.36	133	286	37.7	16.7	188	99400	11.8	0.96	25.7	18.9	2.46
HCC	female	35	134.98	30.7	43	56	I	Yes	Yes	4.2	No	No	4.36	127	103	35.3	9.5	164	3660000	12.8	1.12	29.5	19.7	2.86
HCC	male	64	3.37	31.3	116	43	I	No	No	11.3	Yes	No	6.38	141	216	36.5	11.2	48	100	12.7	1.11	30.5	20	3.66
HCC	male	69	463762	14.5	78	122	III	Yes	No	12.5	Yes	No	5.23	162	221	25.5	32.1	447	20	12.5	1.09	27.3	20.7	2.6
HCC	male	66	48.67	14.7	16	21	III	Yes	No	5	Yes	No	5.36	135	165	37.3	11.6	61	54.9	12.9	1.13	27.9	19.6	2.35
HCC	male	51	1430.94	22.4	16	25	I	Yes	No	5.1	Yes	No	5.43	126	252	36	16.6	18	100	12.1	0.98	31.3	19	2.24
HCC	male	44	2	27.4	17	20	I	Yes	No	4.8	Yes	No	10.46	133	141	35.8	21.2	20	100	11.8	1.03	28.3	17.3	3.92
HCC	male	65	2.45	61.2	61	132	III	Yes	No	5	Yes	No	8.86	89	317	29.6	76.6	677	100	13.4	1.17	28.1	19.6	4.7
HCC	male	65	3.93	10.1	18	48	III	No	Yes	11.6	Yes	No	7.51	111	402	34.9	14.7	116	778	13.7	1.21	30.8	17.6	6.91
HCC	male	47	530642	12.9	20	199	I	No	Yes	14.2	Yes	No	15.02	113	253	40	28.6	191	819	14.8	1.31	32.7	18.3	7.17
HCC	male	52	2	26.4	10	18	I	No	Yes	4.7	Yes	No	7.83	144	316	42.2	8.2	23	408	10.6	0.92	26.2	18.1	3.15
HCC	male	53	536.89	49.6	47	99	III	No	Yes	7.7	Yes	No	4.65	128	117	35.6	45.2	567	1790000	13.8	1.21	30.5	20.3	3.39
HCC	male	52	4.49	72.8	30	31	III	No	Yes	2.4	Yes	No	5.51	124	164	31.6	10.1	43	944000	12.5	1.09	27.7	18.8	2.65
HCC	male	59	1.17014e+06	97	32	38	III	No	Yes	9.6	Yes	No	6.7	147	341	0.09	10.2	27	10500	12.1	1.06	29.1	20	2.23
HCC	male	66	976.42	99.3	119	90	III	No	Yes	13.6	Yes	No	6.96	132	196	45.2	31.6	31	500000000	14.2	1.17	30.4	18.9	3.779
HCC	female	76	4302.32	20.4	27	244	III	No	Yes	5	Yes	No	18.24	85	893	34.7	21.9	498	1790	13.2	1.15	29.9	20.4	2.76
HCC	female	69	18.27	22	46	37	I	No	Yes	7.7	Yes	No	5.48	144	209	40.4	11.8	161	482000	11.8	1.03	26.8	17.9	3.23
HCC	female	63	2.52	29.3	45	50	I	No	Yes	2.6	Yes	No	5.35	123	163	37.2	12.1	59	83100	11.6	1.01	27.6	19.3	2.97
HCC	female	60	17.33	29.4	29	31	I	No	Yes	6.1	Yes	No	4.44	146	159	47.2	17.5	50	100	12	1.05	28	18.8	3.39
HCC	male	68	5856.04	14.4	16	116	III	Yes	Yes	5	Yes	No	2.42	100	55	28.6	45.4	29	413000	17.3	1.53	35.7	20.9	1.06
HCC	male	68	634.99	21.6	53	71	III	Yes	Yes	8.7	Yes	No	6.9	119	233	36.2	12.2	127	2730	11.8	1.03	27.8	17.6	5.05
HCC	male	64	5.16	42.6	17	30	III	Yes	Yes	1.3	Yes	No	4.82	146	103	37.2	17.4	55	20	12.5	1.02	27.1	19.1	2.05
HCC	male	54	6.55	53	27	33	I	Yes	Yes	4.8	Yes	No	2.69	97	128	35.7	16.3	51	100	13.5	1.18	28.1	20.2	1.91
HCC	male	44	5.62	54.5	68	44	III	Yes	Yes	4.3	Yes	No	6.92	146	154	40.1	18.7	143	100	13.1	1.07	29	19.4	2.6
HCC	male	53	60.19	137.1	99	62	III	Yes	Yes	8.7	Yes	No	4.89	139	222	34	14.6	311	57.7	12.4	1.08	27.6	19.8	3.4
HCC	female	65	34810.4	18.5	39	66	III	Yes	Yes	6.6	Yes	No	12.85	137	297	27.7	32	168	100	15.2	1.34	32.6	20.8	7.66
HCC	male	51	57080.8	187.1	63	331	III	No	No	12.8	No	Yes	7.55	134	151	34.5	24.2	283	0	12.7	1.11	30.7	18.1	4.23
HCC	male	65	260.44	57	1.8	23	III	Yes	No	3.9	No	Yes	4.7	82	283	41.5	6.7	32	100	12	1.05	27.6	18.2	3.1
HCC	male	59	1205.38	12.2	30	34	III	No	Yes	4.2	No	Yes	5.54	128	145	32.6	10.6	66	1300000	13.6	1.2	30.4	18.6	3.39
HCC	male	32	46.82	390.5	40	94	III	No	Yes	14.2	No	Yes	12.41	114	182	26.2	22.3	160	5280000	17.9	1.58	47.7	18.9	4.91
HCC	male	74	1493.06	17.8	114	298	III	Yes	Yes	13.4	No	Yes	4.95	125	266	21.2	78.1	114	342000	12.4	1.08	32	27.4	1.92
HCC	male	66	6956.78	18.1	10	35	III	Yes	Yes	18	No	Yes	3.65	89	68	30.8	46.2	331	629	15.3	1.35	29.4	19.7	11.38
HCC	male	58	86.21	18.2	63	64	III	Yes	Yes	3.8	No	Yes	3.62	139	41	31.8	12.3	123	214000	18.4	1.65	33.5	20	1.29
HCC	male	52	5.36	21.7	150	169	III	Yes	Yes	11.8	No	Yes	4.16	135	124	37.3	19.8	110	10500000	12.7	1.11	30.6	21.6	2.45
HCC	male	51	2420.21	14.7	63	62	III	Yes	No	14.2	Yes	Yes	9.15	126	283	38.1	15.9	235	20	13.7	1.12	34.4	18.9	4.98
HCC	female	52	45.06	12.6	18	29	III	Yes	No	8.3	Yes	Yes	7.36	125	117	35.8	41	167	20	12.9	1.13	27.8	17.1	4.84
HCC	male	63	24851.2	7.5	43	96	III	No	Yes	11.2	Yes	Yes	7.79	150	241	35.1	18	551	1380000	12.5	1.02	27.6	19	4.46
HCC	male	65	13.92	119.9	20	30	III	No	Yes	6.3	Yes	Yes	8.28	163	153	40.3	23	58	219	12.9	1.13	28.9	18.8	2.26
HCC	male	49	119.1	181.8	101	143	III	No	Yes	6.7	Yes	Yes	11.16	123	233	32.8	57.6	898	5240	12.1	1.06	28.5	20.3	3.23
HCC	male	68	12.67	12.6	24	31	III	Yes	Yes	10.6	Yes	Yes	4.91	106	175	36.8	12.7	77	893	12.7	1.03	27.7	19.1	2.8
HCC	male	62	36533.1	24.1	103	240	III	Yes	Yes	14.4	Yes	Yes	7.87	152	207	34.5	88	513	17100	14.6	1.28	27.2	20.9	2.42
HCC	female	59	20.79	21.1	42	34	III	Yes	Yes	3.9	Yes	Yes	6.3	143	143	33.1	11.6	70	119000	13.1	1.15	34.1	19.6	2.36
HCC	female	78	3047.28	46.7	52	82	III	Yes	Yes	5.9	Yes	Yes	9.57	135	247	35.4	23	651	607	12.1	1.05	26.4	18.9	3.42
CHB	female	73	2.03	17.1	32	35
CHB	female	70	4.97	15.7	25	31
CHB	female	69	5.07	18.9	40	24
CHB	female	65	3	12.9	45	38
CHB	female	65	3.28	13.7	30	26
CHB	female	64	5.23	17.7	71	23
CHB	female	63	2.39	21.3	21	16
CHB	female	62	3.16	19.3	22	17
CHB	female	61	2.38	14.3	37	11
CHB	female	61	3.78	13.4	20	39
CHB	female	58	2.78	5.6	33	14
CHB	female	56	2	10.1	28	27
CHB	female	48	2.51	20.6	31	59
CHB	female	42	2	8.2	28	19
CHB	female	42	1.28	25.1	31	15
CHB	female	38	5.03	7.7	22	14
CHB	female	36	2.56	13.4	42	15
CHB	female	34	3.86	6.2	/	/
CHB	female	28	3.81	12.8	/	/
CHB	male	71	8.01	20.3	13	19
CHB	male	70	8.32	30.4	74	66
CHB	male	70	4.32	24	33	31
CHB	male	69	4.54	19.6	44	50
CHB	male	69	4.83	16.9	22	18
CHB	male	69	4.69	13.5	53	49
CHB	male	68	2.45	31	40	50
CHB	male	68	4.51	19.2	30	23
CHB	male	68	7.92	15.7	16	14
CHB	male	67	7.55	14.2	30	45
CHB	male	67	9.83	29.4	82	75
CHB	male	67	5.54	16.3	25	26
CHB	male	66	2.19	36.3	79	69
CHB	male	66	6.07	20.9	28	31
CHB	male	66	5.64	15.7	29	24
CHB	male	65	6.03	13.8	33	40
CHB	male	65	5.24	14.7	21	35
CHB	male	65	6.24	19.5	22	25
CHB	male	65	3	10.2	25	21
CHB	male	64	8.21	21.1	24	26
CHB	male	64	5.05	24.5	32	35
CHB	male	64	4.61	22.6	18	21
CHB	male	64	3.55	19.3	30	31
CHB	male	63	8.58	22.5	31	29
CHB	male	62	5	40.5	120	67
CHB	male	62	2.09	24.9	28	34
CHB	male	62	3.41	20.1	38	40
CHB	male	62	5.45	20.7	23	24
CHB	male	62	6.65	14.2	30	28
CHB	male	62	3.84	21.4	28	25
CHB	male	61	4.26	31.2	53	60
CHB	male	61	4.52	11.7	14	18
CHB	male	61	2.59	19.5	26	30
CHB	male	61	4.75	15.4	25	28
CHB	male	60	6.29	9.4	36	32
CHB	male	60	3.78	16.6	12	17
CHB	male	60	3.98	20.3	21	31
CHB	male	60	3.45	25.5	16	15
CHB	male	59	5.09	16.1	24	21
CHB	male	59	3.69	35.1	21	26
CHB	male	59	2.87	26.4	21	16
CHB	male	59	5.92	16.5	16	24
CHB	male	58	6.39	24	15	13
CHB	male	58	4.66	25.6	25	23
CHB	male	58	7.07	34.2	18	12
CHB	male	58	2.48	27.6	15	13
CHB	male	57	8.6	19.7	11	17
CHB	male	57	7.24	42.3	77	65
CHB	male	56	4.91	20.3	14	16
CHB	male	56	3.21	18.7	43	48
CHB	male	56	5.67	17.8	28	25
CHB	male	56	5.08	26.4	36	29
CHB	male	55	4.33	22.4	31	27
CHB	male	55	3.41	31.9	16	15
CHB	male	55	4.95	68.6	62	71
CHB	male	54	2.97	26.4	39	35
CHB	male	54	4.81	45.7	65	56
CHB	male	53	5.13	24.1	20	15
CHB	male	51	3.87	25.8	37	43
CHB	male	50	2.09	29.3	43	59
CHB	male	49	6.53	17.8	24	26
CHB	male	49	3	18.8	9	11
CHB	male	48	4.26	20.5	23	26
CHB	male	48	4.77	14.6	17	26
CHB	male	47	5.34	19.1	30	29
CHB	male	47	4.89	18.9	16	29
CHB	male	46	2.19	23.5	24	25
CHB	male	45	3.82	21.4	25	32
CHB	male	45	3.95	6.5	19	16
CHB	male	43	2.92	13.9	36	35
CHB	male	42	6.42	30.9	/	/
HCs	female	68	3.22	9.1	23	32
HCs	female	68	2	5.4	25	32
HCs	female	67	2.97	6.9	15	23
HCs	female	65	4.36	6.5	12	18
HCs	female	64	3.99	7.6	15	24
HCs	female	60	2.5	26.9	8	14
HCs	female	59	3.23	4.8	26	37
HCs	female	53	2	15.4	12	19
HCs	female	52	2.01	6.6	13	18
HCs	female	51	6.1	17.3	15	10
HCs	female	49	2.79	3	9	19
HCs	female	47	3.07	12.6	9	16
HCs	female	46	2	4.4	10	15
HCs	female	45	3.99	13.6	22	19
HCs	female	44	2	8.2	14	18
HCs	female	43	2	8.3	13	17
HCs	female	42	3.96	16.7	13	19
HCs	female	40	6.1	5.8	30	21
HCs	female	39	2	6.7	21	22
HCs	male	69	4.76	12.6	27	30
HCs	male	69	5.21	4.6	16	20
HCs	male	69	4.66	3	22	28
HCs	male	69	2	3.6	12	15
HCs	male	68	3.05	4.9	16	19
HCs	male	68	6.8	8.5	15	22
HCs	male	68	4.51	7.8	24	25
HCs	male	67	7.25	17.6	24	20
HCs	male	67	2	21.2	31	29
HCs	male	67	5.5	6.3	31	26
HCs	male	66	6.54	21.5	10	18
HCs	male	66	2.97	29.2	14	25
HCs	male	65	5.37	5.3	26	30
HCs	male	65	3.74	7.2	25	26
HCs	male	64	4.65	5.4	12	15
HCs	male	64	3.22	4.4	25	15
HCs	male	63	4.32	19.5	15	26
HCs	male	63	4.32	14.6	22	27
HCs	male	63	2	18.3	15	12
HCs	male	63	3.31	5.2	17	12
HCs	male	63	3.69	8.9	13	17
HCs	male	62	5.32	10.4	15	21
HCs	male	62	6.52	9.2	16	14
HCs	male	61	6.78	5.7	33	25
HCs	male	61	6.93	3.7	9	13
HCs	male	61	5.76	7.9	16	13
HCs	male	61	3.73	10.1	33	27
HCs	male	60	3.45	8.6	10	18
HCs	male	60	4.37	11.3	13	15
HCs	male	60	4.62	6.5	11	20
HCs	male	59	4.82	15.3	9	21
HCs	male	59	2.56	4.5	15	19
HCs	male	59	2.45	7.6	35	28
HCs	male	59	5.98	7.4	11	15
HCs	male	58	4.68	3.97	15	19
HCs	male	58	2.83	4.8	15	18
HCs	male	58	2.67	5.3	23	26
HCs	male	58	3.65	6.5	34	29
HCs	male	57	3.27	9.1	17	14
HCs	male	57	5.89	6.9	24	21
HCs	male	56	3.54	9.4	18	14
HCs	male	56	3.77	9.4	15	20
HCs	male	56	2.38	14	31	25
HCs	male	56	9.02	8.1	19	24
HCs	male	56	4.31	9.2	28	24
HCs	male	56	3.08	3.5	22	18
HCs	male	56	5.68	4.5	21	19
HCs	male	55	3.11	7.7	14	18
HCs	male	55	3.4	4.9	21	17
HCs	male	55	6.49	7.8	12	17
HCs	male	54	5.31	4.6	14	21
HCs	male	52	2.88	3	9	15
HCs	male	52	7.43	5.5	9	12
HCs	male	51	2.39	4.9	10	17
HCs	male	49	4.57	8.4	26	30
HCs	male	49	4.43	8.2	13	15
HCs	male	48	3.92	15.3	25	23
HCs	male	47	2	3	10	16
HCs	male	47	4.5	5.4	24	19
HCs	male	47	11.4	12.7	23	18
HCs	male	47	5.78	4.6	15	11
HCs	male	46	2	20.3	23	28
HCs	male	46	9.67	10.9	26	31
HCs	male	45	2.03	15.6	16	16
HCs	male	45	3.09	7.5	10	13
HCs	male	44	5.25	7.3	21	25
HCs	male	42	3.47	5.2	13	20
HCs	male	42	6.54	9.4	28	27
HCs	male	40	2.42	3	7	15
HCs	male	39	5.77	10.4	13	16
HCs	female	71	6.71	9.1	26	19
